# Supplementary material
Source: publisher site journal article supplement (https://www.dovepress.com/article/443380)
Supplement: Supplementary file 1 [file get_supplementary_file.php]

# Supplementary Figures

Supplementary Figure 1 Study design.

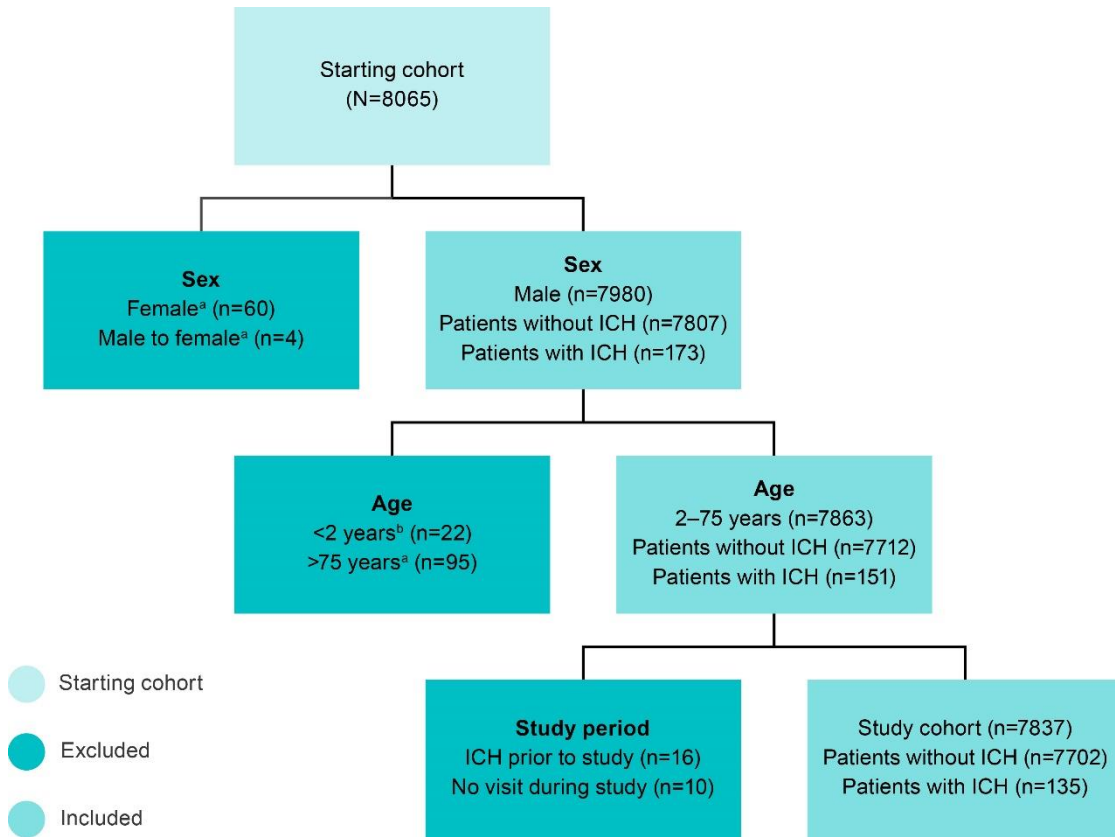

**Abbreviations:** ICH, intracranial hemorrhage.

<sup>a</sup>No individuals experienced an ICH.

<sup>b</sup>All individuals experienced an ICH.

**Supplementary Figure 2** Risk of ICH in multivariable analysis with all covariates.

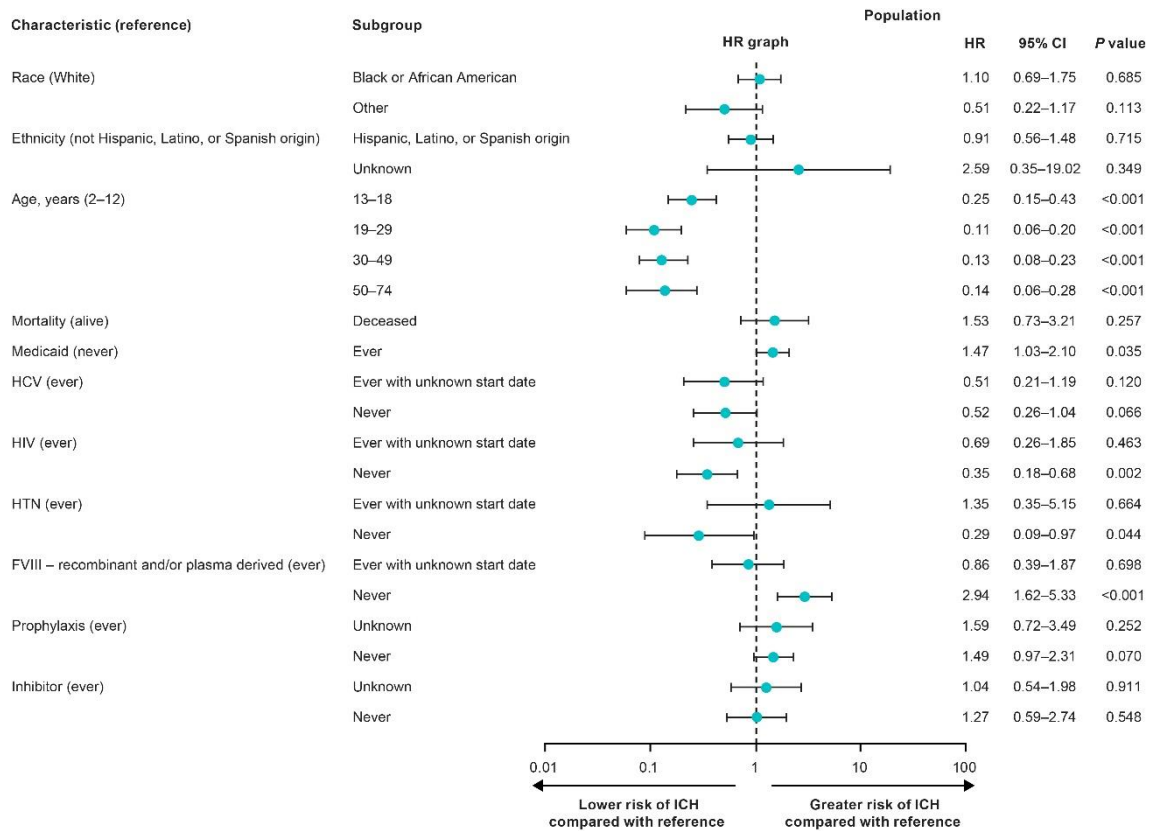

**Abbreviations:** CI, confidence interval; FVIII, factor VIII; HCV, hepatitis C virus; HR, hazard ratio; HTN, hypertension; ICH, intracranial hemorrhage.

**Supplementary Figure 3** Risk of ICH in multivariable analysis with statistically significant covariates (univariate analysis).

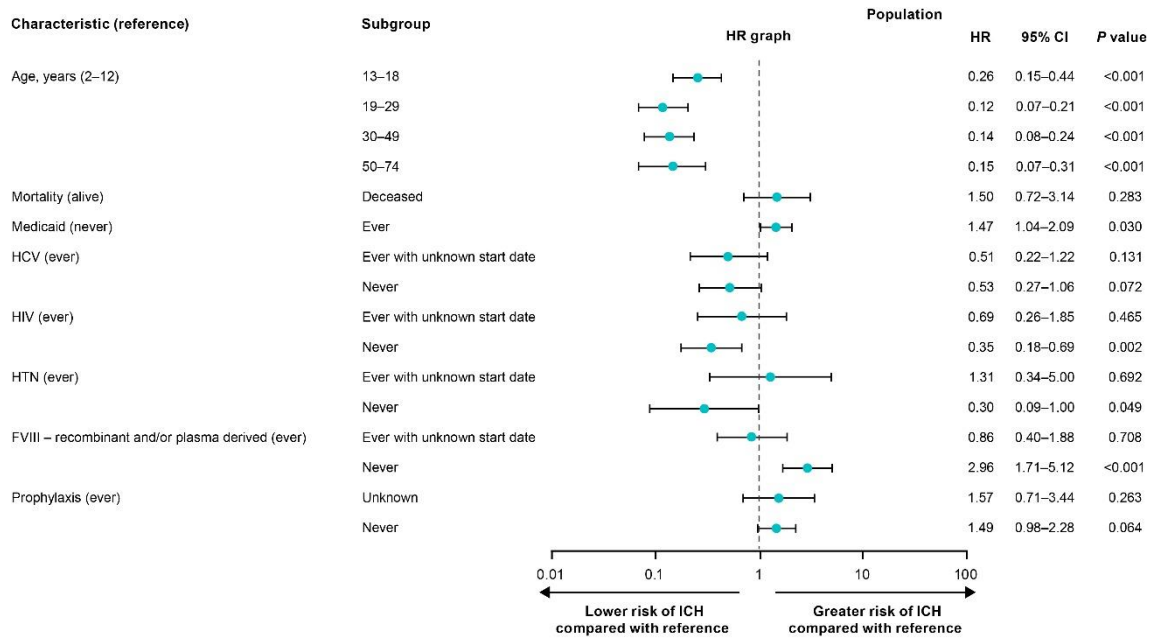

**Abbreviations:** CI, confidence interval; FVIII, factor VIII; HCV, hepatitis C virus; HR, hazard ratio; HTN, hypertension; ICH, intracranial hemorrhage.

**Supplementary Figure 4** Risk of ICH in multivariable analysis with statistically significant covariates (univariate analysis) and inhibitor status.

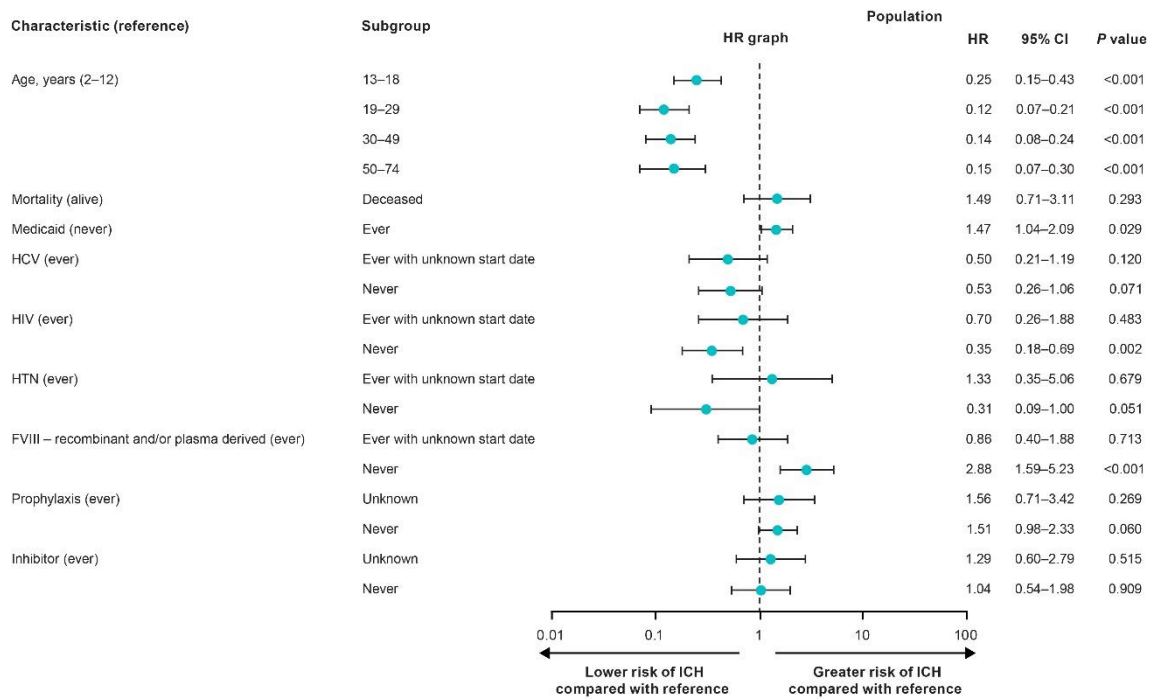

**Abbreviations:** CI, confidence interval; FVIII, factor VIII; HCV, hepatitis C virus; HR, hazard ratio; HTN, hypertension; ICH, intracranial hemorrhage.

## Supplementary Tables

**Supplementary Table 1** ICH incidence in age groups stratified by prophylaxis status

| Age, years                  | No ICH, n (%) | ICH, n (%) | P-value |
|-----------------------------|---------------|------------|---------|
| <b>2–12</b>                 | n=956         | n=47       | 0.400   |
| Yes                         | 729 (76.3)    | 32 (68.1)  |         |
| No                          | 151 (15.8)    | 10 (21.3)  |         |
| Yes with unknown start date | 76 (7.9)      | 5 (10.6)   |         |
| <b>13–18</b>                | n=1317        | n=19       | 0.500   |
| Yes                         | 1104 (83.8)   | 15 (78.9)  |         |
| No                          | 142 (10.8)    | 2 (10.5)   |         |
| Yes with unknown start date | 71 (5.4)      | 2 (10.5)   |         |
| <b>19–29</b>                | n=2205        | n=16       | 0.800   |
| Yes                         | 1679 (76.1)   | 14 (87.5)  |         |
| No                          | 349 (15.8)    | 1 (6.2)    |         |
| Yes with unknown start date | 177 (8.0)     | 1 (6.3)    |         |
| <b>30–49</b>                | n=2293        | n=29       | 0.300   |
| Yes                         | 1544 (67.3)   | 16 (55.2)  |         |
| No                          | 518 (22.6)    | 10 (34.5)  |         |
| Yes with unknown start date | 231 (10.1)    | 3 (10.3)   |         |
| <b>50–74</b>                | n=931         | n=24       | 0.400   |
| Yes                         | 503 (54.0)    | 11 (45.8)  |         |
| No                          | 354 (38.0)    | 13 (54.2)  |         |
| Yes with unknown start date | 74 (7.9)      | 0 (0)      |         |

**Abbreviation:** ICH, intracranial hemorrhage.

**Supplementary Table 2** Bootstrap sensitivity analysis of univariate CoxPH model

| Characteristic                                                 | Population |           | Bootstrap Sensitivity |              |
|----------------------------------------------------------------|------------|-----------|-----------------------|--------------|
|                                                                | HR         | 95% CI    | HR                    | 95% CI       |
| Race (reference: White)                                        |            |           |                       |              |
| Black or African American                                      | 1.18       | 0.76–1.84 | 1.24                  | 0.88–1.65    |
| Other                                                          | 0.60       | 0.26–1.36 | 0.93                  | 0.37–1.27    |
| Ethnicity (reference: not Hispanic, Latinx, Spanish)           |            |           |                       |              |
| Hispanic, Latinx, Spanish                                      | 1.01       | 0.64–1.60 | 0.87                  | 0.76–1.48    |
| Unknown                                                        | 1.73       | 0.24–12.3 | 1.54                  | 8.15e-7–2.86 |
| Age, years (reference: 2–12)                                   |            |           |                       |              |
| 13–18                                                          | 0.25       | 0.14–0.42 | 0.37                  | 0.24–0.51    |
| 19–29                                                          | 0.12       | 0.07–0.22 | 0.23                  | 0.13–0.27    |
| 30–49                                                          | 0.21       | 0.13–0.34 | 0.40                  | 0.22–0.41    |
| 50–74                                                          | 0.43       | 0.26–0.71 | 0.56                  | 0.35–0.69    |
| Mortality (reference: alive)                                   |            |           |                       |              |
| Deceased                                                       | 2.34       | 1.23–4.44 | 2.52                  | 1.17–3.10    |
| Current or prior Medicaid (reference: no)                      |            |           |                       |              |
| Yes                                                            | 1.51       | 1.08–2.12 | 1.27                  | 1.04–1.65    |
| Current or prior HCV (reference: Yes)                          |            |           |                       |              |
| Yes with unknown start date                                    | 0.42       | 0.20–0.91 | 0.37                  | 0.31–0.86    |
| No                                                             | 0.50       | 0.30–0.85 | 0.48                  | 0.46–0.96    |
| Current or prior HIV (reference: yes)                          |            |           |                       |              |
| Yes with unknown start date                                    | 0.50       | 0.21–1.21 | 0.42                  | 0.32–1.05    |
| No                                                             | 0.37       | 0.22–0.62 | 0.39                  | 0.36–0.77    |
| Current or prior HTN (reference: yes)                          |            |           |                       |              |
| Yes with unknown start date                                    | 1.08       | 0.29–4.10 | 1.45                  | 0.43–2.80    |
| No                                                             | 0.36       | 0.10–1.00 | 0.66                  | 0.23–1.19    |
| Current or prior FVIII (rFVIII and/or pdFVIII; reference: yes) |            |           |                       |              |

| Characteristic                                | Population |           | Bootstrap Sensitivity |           |
|-----------------------------------------------|------------|-----------|-----------------------|-----------|
|                                               | HR         | 95% CI    | HR                    | 95% CI    |
| Yes with unknown start date                   | 1.01       | 0.54–1.90 | 1.39                  | 0.73–1.86 |
| No                                            | 2.79       | 1.67–4.66 | 2.34                  | 1.40–2.86 |
| Current or prior prophylaxis (reference: yes) |            |           |                       |           |
| Yes with unknown start date                   | 1.24       | 0.66–2.32 | 1.07                  | 0.79–1.95 |
| No                                            | 1.56       | 1.06–2.29 | 1.67                  | 1.09–1.88 |
| Current or prior inhibitor (reference: yes)   |            |           |                       |           |
| Yes with unknown start date                   | 0.72       | 0.34–1.54 | 0.68                  | 0.47–1.30 |
| No                                            | 0.57       | 0.32–1.04 | 0.59                  | 0.44–1.03 |

**Abbreviations:** CI, confidence interval; CoxPH, Cox proportional hazards; FVIII, factor VIII; HCV, hepatitis C virus; HR, hazard ratio; HTN, hypertension; pdFVIII, plasma-derived FVIII; rFVIII, recombinant FVIII.
